# Supplementary material for: Seasonal treatment and economic evaluation of an algal wastewater system for energy and nutrient recovery
Source: Royal Society of Chemistry journal article supplement (doi:10.1039/c9ew00242a), 2019-01-01
Supplement: c9ew00242a1.pdf [file c9ew00242a1.pdf]

Electronic supplementary information (ESI) for

## **Seasonal Treatment and Economic Performance of an Algal Wastewater System for Energy and Nutrient Recovery**

Yalin Li<sup>a,b,†</sup>, Sydney A. Slouka<sup>a,b</sup>, Shanka M. Henkanatte-Gedera<sup>b,c,§</sup>,

Nagamany Nirmalakhandan<sup>b,c</sup>, Timothy J. Strathmann<sup>\*,a,b,d</sup>

<sup>a</sup>Department of Civil and Environmental Engineering, Colorado School of Mines, Golden, CO 80401, USA

<sup>b</sup>Engineering Research Center for Re-inventing the Nation's Urban Water Infrastructure (ReNUWIt), USA

<sup>c</sup>Civil Engineering Department, New Mexico State University, Las Cruces, NM 88011, USA

<sup>d</sup>National Bioenergy Center, National Renewable Energy Laboratory, Golden, CO 80401, USA

<sup>†</sup>Present address: Institute for Sustainability, Energy, and Environment, University of Illinois at Urbana-Champaign, Urbana, IL 61801, USA

<sup>§</sup>Present address: Pacific Advanced Civil Engineering Inc., Fountain Valley, CA 92708, USA

\*Corresponding author: T. Strathmann, E-mail: strthmnn@mines.edu, Phone: +1 (303) 384-2226

**Table S1** Treatment operating conditions and characteristics of wastewater

|                      |                                                                      | <b>Cold-B</b>                                                        | <b>Trans-B</b>        | <b>Warm-B</b>   | <b>Warm-FB</b>    |
|----------------------|----------------------------------------------------------------------|----------------------------------------------------------------------|-----------------------|-----------------|-------------------|
| Operating conditions | Species                                                              | Soos                                                                 | Soos and CCMEE 5587.1 | CCMEE 5587.1    | CCMEE 5587.1      |
|                      | Test mode                                                            | Batch                                                                | Batch                 | Batch           | Fed-batch         |
|                      | Treatment time (days)                                                | 10                                                                   | 10                    | 10 <sup>a</sup> | 20 <sup>b</sup>   |
|                      | Temperature (°C) <sup>c</sup>                                        | 13–37                                                                | 10–27                 | 31–46           | 27–42             |
| Input <sup>d</sup>   | Source water                                                         | Primary clarifier effluent from municipal wastewater treatment plant |                       |                 |                   |
|                      | BOD <sub>5</sub> (mg O <sub>2</sub> ·L <sup>-1</sup> ) <sup>e</sup>  | 68.5±7.7                                                             | 61.5±1.5              | 111.5±12.0      | 63.0 <sup>f</sup> |
|                      | NH <sub>4</sub> <sup>+</sup> -N (mg N·L <sup>-1</sup> ) <sup>g</sup> | 24.8±0.3                                                             | 29.2±0.6              | 23.7±0.4        | 22.7±0.2          |
|                      | PO <sub>4</sub> <sup>3-</sup> (mg·L <sup>-1</sup> ) <sup>h</sup>     | 3.2±0.1                                                              | 2.1±0.1               | 3.6±0.04        | 3.9±0.1           |
| Output <sup>d</sup>  | BOD <sub>5</sub> (mg O <sub>2</sub> ·L <sup>-1</sup> )               | 22.5±2.2                                                             | 17.0±1.4              | 30.0±1.4        | 22.5±2.1          |
|                      | NH <sub>4</sub> <sup>+</sup> -N (mg N·L <sup>-1</sup> )              | 19.5±0.4                                                             | 19.9±2.7              | 6.4±0.4         | 9.4±0.3           |
|                      | PO <sub>4</sub> <sup>3-</sup> (mg·L <sup>-1</sup> )                  | 0.2±0.02                                                             | 0.2±0.05              | 0.1±0.01        | 0.7±0.02          |
| Discharge standards  | BOD <sub>5</sub> (mg O <sub>2</sub> ·L <sup>-1</sup> )               |                                                                      |                       |                 | 30                |
|                      | NH <sub>4</sub> <sup>+</sup> -N (mg N·L <sup>-1</sup> )              |                                                                      |                       |                 | 10                |
|                      | PO <sub>4</sub> <sup>3-</sup> (mg·L <sup>-1</sup> )                  |                                                                      |                       |                 | 1                 |

<sup>a</sup> Although the Warm-B test lasted for 10 days, all discharge standards were met within 4 days.

<sup>b</sup> For the Warm-FB test, 400 L of the treated wastewater (57% of the total volume) was harvested after discharge standards were met, then the reactor was replenished with fresh primary effluent to start a new treatment cycle. The 20-day experiment included 5 continuous cycles, each lasting 2–3 days. All wastewater characteristics (both input and output) for the Warm-FB test were from the last cycle, and HTL experiments in this study also used the biomass harvested from the last cycle.

<sup>c</sup> Temperatures here refer to the culture temperature in algal photobioreactors.

<sup>d</sup> Input denotes the input into algal treatment system (primary clarifier effluent from wastewater treatment plant), and output denotes the algal-treated wastewater.

<sup>e</sup> Dissolved BOD<sub>5</sub> was measured instead of total BOD<sub>5</sub> following the protocol in <sup>1</sup>, as the algal biomass would affect total BOD<sub>5</sub>. Results were shown as average±max/min of duplicate analysis.

<sup>f</sup> No error values because duplicate analysis yielded the same results.

<sup>g</sup> NH<sub>4</sub><sup>+</sup>-N was measured using Hach Salicylate kit,<sup>1</sup> results were shown as average values±standard deviations of triplicate analysis.

<sup>h</sup> PO<sub>4</sub><sup>3-</sup> was measured using Hach PhosVer 3 kit,<sup>1</sup> results were shown as average values±standard deviations of triplicate analysis.

**Table S2** Elemental compositions of algal biomass<sup>a</sup>

|                                         | <b>Cold-B</b> | <b>Trans-B</b>   | <b>Warm-B</b> | <b>Warm-FB</b>   |
|-----------------------------------------|---------------|------------------|---------------|------------------|
| C (dw%)                                 | 31.4±0.1      | 46.9±0.01        | 40.0±0.03     | 40.1±0.04        |
| H (dw%)                                 | 5.3±0.02      | 7.1±0.1          | 6.1±0.02      | 6.2 <sup>b</sup> |
| N (dw%)                                 | 4.9±0.04      | 9.0 <sup>b</sup> | 7.3±0.02      | 8.2 <sup>b</sup> |
| P (dw%)                                 | 1.1±0.01      | 1.7±0.1          | 0.8±0.1       | 0.9±0.03         |
| Volatile O (dw%) <sup>c</sup>           | 28.2±0.4      | 25.1±0.1         | 28.5±0.2      | 27.5±0.1         |
| HHV (MJ·kg <sup>-1</sup> ) <sup>d</sup> | 13.1±0.1      | 21.4±0.1         | 17.2±0.05     | 17.5±0.03        |

<sup>a</sup> Results are shown as average±max/min of duplicate analysis; errors for volatile oxygen contents and higher heating values (HHV) were calculated by error propagation methods.

<sup>b</sup> No error value because duplicate analysis yielded the same results.

<sup>c</sup> Calculated by difference as 1 - C - H - N - P - ash (all on dry weight basis, dw%).

<sup>d</sup> Calculated using Dulong's equation.<sup>2</sup>

**Table S3** Characteristics of HTL biocrude and biochar products<sup>a</sup>

|                     |                                         | Cold-B    | Trans-B           | Warm-B            | Warm-FB           |
|---------------------|-----------------------------------------|-----------|-------------------|-------------------|-------------------|
| 300°C<br>(Biocrude) | C (%)                                   | 70.4±0.3  | 70.2±0.4          | 70.3±0.6          | 71.0±0.7          |
|                     | H (%)                                   | 8.4±0.1   | 8.8±0.02          | 8.4±0.2           | 8.4±0.2           |
|                     | N (%)                                   | 6.9±0.002 | 6.9±0.1           | 6.4±0.01          | 7.0±0.1           |
|                     | O (%) <sup>b</sup>                      | 14.4±0.3  | 14.1±0.3          | 14.8±0.6          | 13.6±0.8          |
|                     | HHV (MJ·kg <sup>-1</sup> ) <sup>c</sup> | 33.1±0.1  | 33.8±0.1          | 33.1±0.3          | 33.6±0.4          |
| 350°C<br>(Biocrude) | C (%)                                   | 73.5±0.2  | 71.2±0.9          | 73.0±0.4          | 72.5±0.1          |
|                     | H (%)                                   | 8.5±0.04  | 8.6±0.1           | 8.8±0.04          | 8.8±0.03          |
|                     | N (%)                                   | 6.4±0.2   | 6.5±0.2           | 6.1±0.1           | 6.5±0.1           |
|                     | O (%) <sup>b</sup>                      | 11.6±0.2  | 13.7±0.9          | 12.2±0.4          | 12.2±0.1          |
|                     | HHV (MJ·kg <sup>-1</sup> ) <sup>c</sup> | 34.9±0.1  | 33.8±0.3          | 35.0±0.2          | 34.9±0.1          |
| 300°C<br>(Biochar)  | C (%)                                   | 26.6±0.2  | <sup>d</sup>      | 24.7±2.1          | 25.4±3.8          |
|                     | H (%)                                   | 3.8±0.01  | <sup>d</sup>      | 3.6±0.3           | 3.9±0.4           |
|                     | N (%)                                   | 2.9±0.1   | <sup>d</sup>      | 2.8±0.2           | 3.1±0.5           |
|                     | P (%)                                   | 2.5±0.2   | <sup>d</sup>      | 3.2±0.05          | 3.4±0.1           |
| 350°C<br>(Biochar)  | C (%)                                   | 23.6±3.7  | 11.6 <sup>e</sup> | 15.1 <sup>e</sup> | 21.9 <sup>e</sup> |
|                     | H (%)                                   | 3.1±0.3   | 1.4 <sup>e</sup>  | 2.6 <sup>e</sup>  | 3.3 <sup>e</sup>  |
|                     | N (%)                                   | 2.4±0.3   | 2.8 <sup>e</sup>  | 2.2 <sup>e</sup>  | 3.3 <sup>e</sup>  |
|                     | P (%)                                   | 2.9±0.1   | <sup>d</sup>      | <sup>d</sup>      | <sup>d</sup>      |

<sup>a</sup> Results are shown as average±max/min of duplicate analysis; errors for oxygen contents and HHV were calculated by error propagation methods; all elemental contents were shown as weight percentage (wt%).

<sup>b</sup> Calculated by difference as 1 - C - H - N.

<sup>c</sup> Calculated using Dulong's equation.<sup>2</sup>

<sup>d</sup> Data unavailable due to the scarcity of sample.

<sup>e</sup> No duplicate analysis due to the scarcity of sample.

**Table S4** Characteristics of HTL aqueous products<sup>a</sup>

|       |                                                         | Cold-B     | Trans-B    | Warm-B     | Warm-FB    |
|-------|---------------------------------------------------------|------------|------------|------------|------------|
| 300°C | TOC (mg C·L <sup>-1</sup> )                             | 11800±1500 | 29500±200  | 28000±500  | 31300±4300 |
|       | TN (mg N·L <sup>-1</sup> )                              | 4000±300   | 11400±700  | 8600±200   | 10600±800  |
|       | NH <sub>4</sub> <sup>+</sup> -N (mg N·L <sup>-1</sup> ) | 1980±170   | 4870±70    | 3910±220   | 3670±50    |
|       | NH <sub>4</sub> <sup>+</sup> -N/TN (%)                  | 50.0±6.0   | 42.6±2.8   | 45.6±2.9   | 34.7±2.7   |
|       | PO <sub>4</sub> <sup>3-</sup> (mg·L <sup>-1</sup> )     | 42±16      | 732±21     | 137±10     | 6±3        |
| 350°C | TOC (mg C·L <sup>-1</sup> )                             | 16100±1000 | 26600±2800 | 23800±2200 | 19900±1000 |
|       | TN (mg N·L <sup>-1</sup> )                              | 5300±100   | 12600±500  | 9800±700   | 10300±600  |
|       | NH <sub>4</sub> <sup>+</sup> -N (mg N·L <sup>-1</sup> ) | 3350±30    | 8450±900   | 5050±20    | 6050±260   |
|       | NH <sub>4</sub> <sup>+</sup> -N/TN (%)                  | 63.6±1.1   | 67.3±7.5   | 51.6±3.5   | 59.0±4.0   |
|       | PO <sub>4</sub> <sup>3-</sup> (mg·L <sup>-1</sup> )     | 115±7      | 414±111    | 107±1      | 93±7       |

<sup>a</sup> Results are shown as average±max/min of duplicate analysis; errors for NH<sub>4</sub><sup>+</sup>-N/TN ratios were calculated by error propagation methods; NO<sub>2</sub><sup>-</sup>/NO<sub>3</sub><sup>-</sup> contents were below detection limits for all batches.

**Table S5** Summary of annual product yields and economic analysis (Scenarios 1–3)<sup>a</sup>

|                                                |                                                              | Cold-B                     | Trans-B | Warm-B | Average |
|------------------------------------------------|--------------------------------------------------------------|----------------------------|---------|--------|---------|
|                                                |                                                              | <i>Biofuel<sup>b</sup></i> |         |        |         |
| Cost (MM \$.yr <sup>-1</sup> ) <sup>c</sup>    | Capital                                                      | 0.40                       | 0.40    | 0.40   | 0.40    |
|                                                | Operating                                                    | 0.65                       | 0.66    | 0.66   | 0.66    |
|                                                | Financial                                                    | 0.98                       | 1.01    | 1.00   | 1.00    |
| Revenue                                        | Biofuel yields (MM GGE.yr <sup>-1</sup> ) <sup>d</sup>       | 0.28                       | 0.70    | 0.55   | 0.51    |
|                                                | Biofuel sales (MM \$.yr <sup>-1</sup> ) <sup>e</sup>         | 0.78                       | 1.95    | 1.55   | 1.43    |
| Net revenue (MM \$.yr <sup>-1</sup> )          |                                                              | -1.26                      | -0.12   | -0.51  | -0.63   |
|                                                |                                                              | <i>Nutrient Products</i>   |         |        |         |
| Yields (MM kg.yr <sup>-1</sup> )               | (NH <sub>4</sub> ) <sub>2</sub> SO <sub>4</sub> <sup>f</sup> | 0.60                       | 1.77    | 1.12   | 1.16    |
|                                                | Struvite <sup>g</sup>                                        | 0.60                       | 0.96    | 0.45   | 0.67    |
| Revenue (MM \$.yr <sup>-1</sup> ) <sup>h</sup> | (NH <sub>4</sub> ) <sub>2</sub> SO <sub>4</sub>              | 0.35                       | 1.04    | 0.66   | 0.68    |
|                                                | Struvite                                                     | 0.25                       | 0.41    | 0.19   | 0.28    |
|                                                | Sum                                                          | 0.60                       | 1.45    | 0.85   | 0.97    |

<sup>a</sup> Costs, revenues, and net revenues are shown in million 2014 U.S. dollars per year (MM \$.yr<sup>-1</sup>) assuming a feedstock flow rate of 576 U.S. ton per day (on dry ash-free basis). Results for Cold-B, Trans-B, and Warm-B were calculated using the respective experiment data (350°C HTL conversion) as inputs of the model described in a previous study;<sup>3</sup> the average results were calculated using the average HTL results of Cold-B, Trans-B, and Warm-B. Warm-FB gave similar results as Warm-B thus not presented.

<sup>b</sup> Liquid hydrocarbon fuels in gasoline and diesel ranges.<sup>3</sup>

<sup>c</sup> Refer to Table S6 for cost breakdown.

<sup>d</sup> Gasoline gallon equivalent per year.

<sup>e</sup> Based on a price of \$2.79 GGE<sup>-1</sup> as commercial gasoline (average price for 2010–2019 reported by U.S. Energy Information Administration).<sup>4</sup>

<sup>f</sup> Yields calculated assuming 92.3% of NH<sub>4</sub><sup>+</sup>-N in HTL aqueous products was converted to (NH<sub>4</sub>)<sub>2</sub>SO<sub>4</sub> based on a previous study.<sup>5</sup>

<sup>g</sup> Magnesium ammonium phosphate (MAP) with a molecular formula of MgNH<sub>4</sub>PO<sub>4</sub>·6H<sub>2</sub>O, yield calculated assuming 92.2% of P in the algal feedstock was converted to struvite based on a previous study.<sup>5</sup>

<sup>h</sup> Based on unit prices of \$0.588 kg<sup>-1</sup> for (NH<sub>4</sub>)<sub>2</sub>SO<sub>4</sub> and \$0.423 kg<sup>-1</sup> for struvite.<sup>5</sup>

**Table S6** Cost breakdown (Scenarios 1–3)<sup>a</sup>

|                                                            |                                              | Cold-B | Trans-B | Warm-B | Average |
|------------------------------------------------------------|----------------------------------------------|--------|---------|--------|---------|
| <i>Capital</i>                                             |                                              |        |         |        |         |
| Capital<br>(lifetime, MM \$)                               | HTL                                          | 2.36   | 2.38    | 2.38   | 2.38    |
|                                                            | Inside battery limits <sup>b</sup>           |        |         |        |         |
|                                                            | Biocrude hydrotreating                       | 0.83   | 0.84    | 0.83   | 0.83    |
|                                                            | Heavy oil hydrocracking                      | 0.21   | 0.21    | 0.21   | 0.21    |
|                                                            | Catalytic hydrothermal gasification          | 2.19   | 2.21    | 2.20   | 2.20    |
|                                                            | Outside battery limits <sup>c</sup>          | 0.94   | 0.95    | 0.95   | 0.95    |
|                                                            | Total non-installed direct cost <sup>d</sup> | 0.98   | 0.99    | 0.98   | 0.98    |
|                                                            | Total indirect cost <sup>e</sup>             | 4.50   | 4.55    | 4.53   | 4.53    |
| Working capital <sup>f</sup>                               | 0.60                                         | 0.61   | 0.60    | 0.60   |         |
| Sum                                                        | 12.61                                        | 12.74  | 12.68   | 12.68  |         |
| Capital (annualized, MM \$·yr <sup>-1</sup> ) <sup>g</sup> |                                              | 0.40   | 0.40    | 0.40   | 0.40    |
| <i>Operating (MM \$·yr<sup>-1</sup>)</i>                   |                                              |        |         |        |         |
| Variable operating cost                                    | Catalysts <sup>h</sup>                       | 0.15   | 0.16    | 0.15   | 0.15    |
|                                                            | Utilities <sup>i</sup>                       | 0.14   | 0.15    | 0.15   | 0.15    |
| Fixed operating cost <sup>j</sup>                          |                                              | 0.35   | 0.36    | 0.36   | 0.36    |
| Sum                                                        |                                              | 0.65   | 0.66    | 0.66   | 0.66    |
| <i>Financial (MM \$·yr<sup>-1</sup>)</i>                   |                                              |        |         |        |         |
| Income tax <sup>k</sup>                                    |                                              | 0.27   | 0.29    | 0.28   | 0.28    |
| Loan payment <sup>l</sup>                                  |                                              | 0.72   | 0.72    | 0.72   | 0.72    |
| Sum                                                        |                                              | 0.98   | 1.01    | 1.00   | 1.00    |

<sup>a</sup> All costs are shown in million 2014 U.S. dollars and calculated using a techno-economic analysis model detailed in Leow et al.<sup>3</sup> The plant was assumed to have a building time of 3 years (before operation started) and an operating time of 30 years. The startup time was 0.5 years, during which the revenue was 50% of regular revenue, and variable operating cost was 75% of the regular operating cost; internal rate of return was 10%.

<sup>b</sup> Capital costs for inside and outside battery limits were scaled from the original equipment cost<sup>3,6</sup> based on material flow rates following method described in Leow et al.<sup>3</sup>

<sup>c</sup> Including hydrogen plant, power generation, steam system, and cooling water system.

<sup>d</sup> Including warehouse building, site development, and additional piping, which were calculated as 17.5% of inside battery limits.

<sup>e</sup> Including prorated expenses calculated as 60% of the total direct cost (sum of inside battery limits, outside battery limits, and total non-installed costs).

<sup>f</sup> Calculated as 5% of fixed capital investment (sum of total direct cost and total indirect cost).

<sup>g</sup> Capital costs averaged to each operating year (working capital not included as it would be paid back at the end of operation).

<sup>h</sup> Including catalysts for catalytic hydrothermal gasification, hydrotreating, hydrocracking, and hydrogen plant.

<sup>i</sup> Including natural gas, electricity, and makeup water.

<sup>j</sup> Including staff salary, labor burden, maintenance, insurances, and taxes.

<sup>k</sup> Loan principle was 60% of fixed capital investment (40% equity), loan interest was 8% and loan term was 10 years.

<sup>l</sup> Income tax was 35% of profit.

**Table S7** Annual cost and revenue breakdown (Scenarios 4–6)<sup>a</sup>

|                   |                                                              | <b>Cold-B</b> | <b>Trans-B</b> | <b>Warm-B</b> | <b>Average-B</b> |
|-------------------|--------------------------------------------------------------|---------------|----------------|---------------|------------------|
| <i>Scenario 4</i> |                                                              |               |                |               |                  |
| Cost              | Capital                                                      | 0.40          | 0.40           | 0.40          | 0.40             |
|                   | Operating                                                    | 0.65          | 0.66           | 0.66          | 0.66             |
|                   | Financial                                                    | 0.99          | 1.01           | 1.01          | 1.01             |
|                   | Sum                                                          | 2.04          | 2.08           | 2.07          | 2.06             |
| Revenue           | Hydrocarbon fuel                                             | 0.75          | 1.98           | 1.49          | 1.33             |
|                   | Ethanol                                                      | 0             | 0              | 0             | 0                |
|                   | (NH <sub>4</sub> ) <sub>2</sub> SO <sub>4</sub> <sup>b</sup> | 0.27          | 0.86           | 0.56          | 0.56             |
|                   | Struvite                                                     | 0.25          | 0.41           | 0.19          | 0.28             |
|                   | Sum                                                          | 1.28          | 3.25           | 2.24          | 2.17             |
| Net revenue       |                                                              | -0.77         | 1.17           | 0.17          | 0.11             |
| <i>Scenario 5</i> |                                                              |               |                |               |                  |
| Cost              | Capital                                                      | 0.49          | 0.49           | 0.49          | 0.49             |
|                   | Operating                                                    | 1.12          | 1.13           | 1.13          | 1.13             |
|                   | Financial                                                    | 1.46          | 1.46           | 1.46          | 1.46             |
|                   | Sum                                                          | 3.07          | 3.09           | 3.09          | 3.08             |
| Revenue           | Hydrocarbon fuel                                             | 1.04          | 2.00           | 1.93          | 1.64             |
|                   | Ethanol                                                      | 1.54          | 0.84           | 0.59          | 0.99             |
|                   | (NH <sub>4</sub> ) <sub>2</sub> SO <sub>4</sub>              | 0.35          | 1.04           | 0.66          | 0.68             |
|                   | Struvite                                                     | 0.25          | 0.41           | 0.19          | 0.28             |
|                   | Sum                                                          | 3.18          | 4.29           | 3.38          | 3.60             |
| Net revenue       |                                                              | 0.10          | 1.19           | 0.29          | 0.52             |
| <i>Scenario 6</i> |                                                              |               |                |               |                  |
| Cost              | Capital                                                      | 0.49          | 0.49           | 0.49          | 0.49             |
|                   | Operating                                                    | 1.12          | 1.13           | 1.13          | 1.13             |
|                   | Financial                                                    | 1.46          | 1.47           | 1.47          | 1.47             |
|                   | Sum                                                          | 3.07          | 3.09           | 3.09          | 3.08             |
| Revenue           | Hydrocarbon fuel                                             | 0.94          | 2.07           | 2.07          | 1.67             |
|                   | Ethanol                                                      | 1.88          | 1.07           | 0.79          | 1.26             |
|                   | (NH <sub>4</sub> ) <sub>2</sub> SO <sub>4</sub> <sup>b</sup> | 0.27          | 0.86           | 0.56          | 0.56             |
|                   | Struvite                                                     | 0.25          | 0.41           | 0.19          | 0.28             |
|                   | Sum                                                          | 3.35          | 4.41           | 3.62          | 3.78             |
| Net revenue       |                                                              | 0.28          | 1.32           | 0.53          | 0.69             |

<sup>a</sup> Costs for Scenario 4 were calculated in the same manner as Scenarios 1–3 with biochemical compositions of peak-storage algae; costs and revenues for Scenarios 5 and 6 were calculated based on Li et al.<sup>7</sup> assuming the same wastewater algae loading (25.6 dry U.S. ton per day, TPD) and total plant scale (576 TPD), but Scenario 5 was for baseline algae while Scenario 6 for peak-storage algae; all costs and revenues are shown in million 2014 U.S. dollars per year (MM \$·yr<sup>-1</sup>).

<sup>b</sup> Yields of ammonium sulfate were proportionally adjusted based on the protein contents of baseline and peak-storage algae.

## References

- (1) Henkanatte-Gedera, S. M.; Selvaratnam, T.; Karbakhshravari, M.; Myint, M.; Nirmalakhandan, N.; Van Voorhies, W.; Lammers, P. J. Removal of Dissolved Organic Carbon and Nutrients from Urban Wastewaters by *Galdieria Sulphuraria*: Laboratory to Field Scale Demonstration. *Algal Res.* **2017**, *24*, Part B, 450–456. <https://doi.org/10.1016/j.algal.2016.08.001>.
- (2) Li, Y.; Leow, S.; Fedders, A. C.; Sharma, B. K.; Guest, J. S.; Strathmann, T. J. Quantitative Multiphase Model for Hydrothermal Liquefaction of Algal Biomass. *Green Chem.* **2017**, *19* (4), 1163–1174. <https://doi.org/10.1039/C6GC03294J>.
- (3) Leow, S.; Shoener, B. D.; Li, Y.; DeBellis, J. L.; Markham, J.; Davis, R.; Laurens, L. M. L.; Pienkos, P. T.; Cook, S. M.; Strathmann, T. J.; et al. A Unified Modeling Framework to Advance Biofuel Production from Microalgae. *Environ. Sci. Technol.* **2018**, *52* (22), 13591–13599. <https://doi.org/10.1021/acs.est.8b03663>.
- (4) U.S. Energy Information Administration. Annual Energy Outlook <https://www.eia.gov/outlooks/aeo/> (accessed May 22, 2019).
- (5) Li, Y.; Tarpeh, W. A.; Nelson, K. L.; Strathmann, T. J. Quantitative Evaluation of an Integrated System for Valorization of Wastewater Algae as Bio-Oil, Fuel Gas, and Fertilizer Products. *Environ. Sci. Technol.* **2018**, *52* (21), 12717–12727. <https://doi.org/10.1021/acs.est.8b04035>.
- (6) Jones, S. B.; Zhu, Y.; Anderson, D. B.; Hallen, R. T.; Elliott, D. C.; Schmidt, A. J.; Albrecht, K. O.; Hart, T. R.; Butcher, M. G.; Drennan, C.; et al. *Process Design and Economics for the Conversion of Algal Biomass to Hydrocarbons: Whole Algae Hydrothermal Liquefaction and Upgrading*; PNNL-23227; Pacific Northwest National Laboratory (PNNL), Richland, WA (US), 2014.
- (7) Li, Y.; Leow, S.; Dong, T.; Nagle, N. J.; Knoshaug, E. P.; Laurens, L. M. L.; Pienkos, P. T.; Guest, J. S.; Strathmann, T. J. Demonstration and Evaluation of Hybrid Microalgae Aqueous Conversion Systems for Biofuel Production. *ACS Sustain. Chem. Eng.* **2019**, *7* (6), 5835–5844. <https://doi.org/10.1021/acssuschemeng.8b05741>.
